# Supplementary material for: Analysis of drought and heat stress response genes in rice using co-expression network and differentially expressed gene analyses
Source: PeerJ journal article supplement (doi:10.7717/peerj.17255), 2024-04-30
Supplement: Supplementary2.zip [file Supplementary2.zip]

## Sheet: BAG6
CT	BAG6				eEF1
WT	31.47	30.46	31.89	28.45	12.85	12.71	12.38	12.26
HEAT	17.23	17.25	17.23	16.5	12.5	12.42	12.47	12.38
WT						12.55
HEAT						12.4425
△CT
WT	18.92	17.91	19.34	15.9
HEAT	4.7875	4.8075	4.7875	4.0575
△△CT
WT	0.9025	-0.1075	1.3225	-2.1175
HEAT	-13.23	-13.21	-13.23	-13.96
2^(-△△CT)
WT	0.534959	1.07736	0.399841	4.33941
HEAT	9607.86	9475.59	9607.86	15936

## Sheet: HSP23.2
CT	HSP23.2				eEF1
WT	27.69	27.75	27.71	26.99	12.85	12.71	12.38	12.26
HEAT	15.5	14.97	14.35	14.24	12.5	12.42	12.47	12.38
WT						12.55
HEAT						12.4425
△CT
WT	15.14	15.2	15.16	14.44
HEAT	3.0575	2.5275	1.9075	1.7975
△△CT
WT	0.155	0.215	0.175	-0.545
HEAT	-11.9275	-12.4575	-13.0775	-13.1875
2^(-△△CT)
WT	0.898132	0.861546	0.885768	1.45902
HEAT	3895.25	5624.46	8644.1	9328.96

## Sheet: OsDjC53
CT	OsDjC53				eEF1
WT	23.93	24.47	24	23.42	12.85	12.71	12.38	12.26
HEAT	16.59	16.78	16.48	16.35	12.5	12.42	12.47	12.38
WT						12.55
HEAT						12.4425
△CT
WT	11.38	11.92	11.45	10.87
HEAT	4.04	4.23	3.93	3.8
△△CT
WT	-0.025	0.515	0.045	-0.535
HEAT	-7.365	-7.175	-7.475	-7.605
2^(-△△CT)
WT	1.01748	0.699793	0.96929	1.44894
HEAT	164.849	144.507	177.91	194.685

## Sheet: MBF1C
CT	MBF1C				eEF1
WT	24.5	24.4	24.25	24.23	12.85	12.71	12.38	12.26
HEAT	16.4	16.43	16.44	16.44	12.5	12.42	12.47	12.38
WT						12.55
HEAT						12.4425
△CT
WT	11.95	11.85	11.7	11.68
HEAT	3.85	3.88	3.89	3.89
△△CT
WT	0.155	0.055	-0.095	-0.115
HEAT	-7.945	-7.915	-7.905	-7.905
2^(-△△CT)
WT	0.898132	0.962594	1.06807	1.08298
HEAT	246.424	241.353	239.686	239.686

## Sheet: HSP21.9
CT	HSP21.9				eEF1
WT	35.46	39.43	35.29	33.41	12.85	12.71	12.38	12.26
HEAT	27.09	26.32	26.38	24.84	12.5	12.42	12.47	12.38
WT						12.55
HEAT						12.4425
△CT
WT	22.91	26.88	22.74	20.86
HEAT	14.54	13.77	13.83	12.29
△△CT
WT	-0.4375	3.5325	-0.6075	-2.4875
HEAT	-8.8075	-9.5775	-9.5175	-11.0575
2^(-△△CT)
WT	1.35426	0.0864195	1.52362	5.60805
HEAT	448.045	764.038	732.914	2131.27

## Sheet: UGT83A1
CT	UGT83A1				eEF1
WT	20.23	20.27	20.22	20.15	12.85	12.71	12.38	12.26
DROUGHT	21.24	21.24	21.25	21.18	12.57	12.83	12.26	12.21
WT						12.55
DROUGHT						12.4675
△CT
WT	7.68	7.72	7.67	7.6
DROUGHT	8.69	8.69	8.7	8.63
△△CT
WT	0.0125	0.0525	0.0025	-0.0675
DROUGHT	1.0225	1.0225	1.0325	0.9625
2^(-△△CT)
WT	0.991373	0.964264	0.998269	1.0479
DROUGHT	0.492263	0.492263	0.488862	0.513167

## Sheet: OsCPn60a1
CT	OsCPn60a1				eEF1
WT	15.24	15.14	15.12	15.09	12.85	12.71	12.38	12.26
DROUGHT	16.5	16.43	15.45	15.3	12.57	12.83	12.26	12.21
WT						12.55
DROUGHT						12.4675
△CT
WT	2.69	2.59	2.57	2.54
DROUGHT	3.95	3.88	2.9	2.75
△△CT
WT	0.0925	-0.0075	-0.0275	-0.0575
DROUGHT	1.3525	1.2825	0.3025	0.1525
2^(-△△CT)
WT	0.937896	1.00521	1.01924	1.04066
DROUGHT	0.391613	0.411083	0.810846	0.89969
